# Supplementary material for: Ion-induced surface reactions and deposition from Pt(CO)2Cl2 and Pt(CO)2Br2
Source: PubMed Central journal article supplement (PMC11590011; doi:10.3762/bjnano.15.115), 2024-11-19
Supplement: Beilstein_J_Nanotechnol-15-1427-s001.pdf [file Beilstein_J_Nanotechnol-15-1427-s001.pdf]

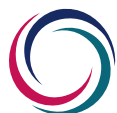

## Supporting Information

for

### **Ion-induced surface reactions and deposition from $\text{Pt}(\text{CO})_2\text{Cl}_2$ and $\text{Pt}(\text{CO})_2\text{Br}_2$**

Mohammed K. Abdel-Rahman, Patrick M. Eckhert, Atul Chaudhary,  
Johnathon M. Johnson, Jo-Chi Yu, Lisa McElwee-White and D. Howard Fairbrother

*Beilstein J. Nanotechnol.* **2024**, *15*, 1427–1439. doi:10.3762/bjnano.15.115

## Additional experimental data

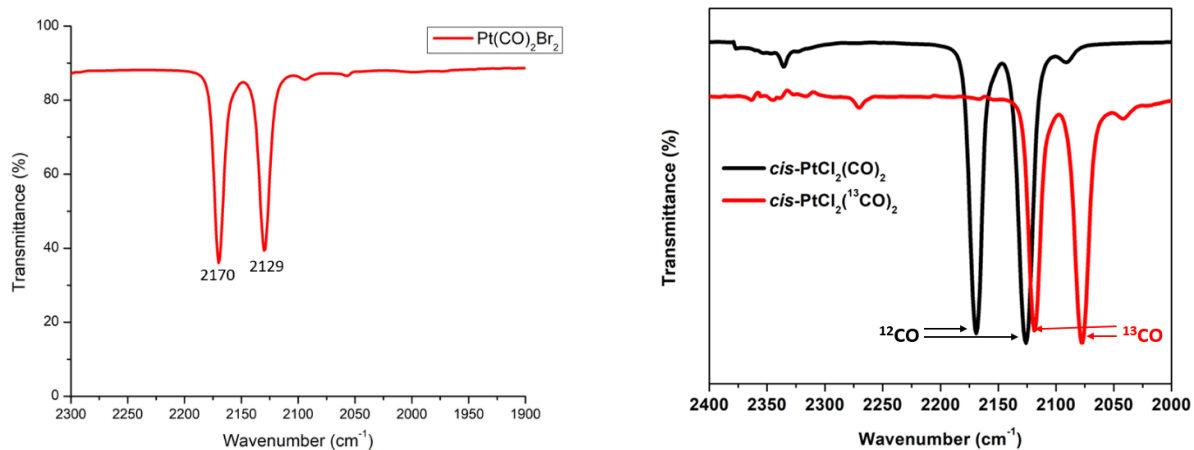

**Figure S1:** (Left) FTIR spectrum of  $\text{cis-Pt}(\text{CO})_2\text{Br}_2$  obtained in dichloromethane solution. (Right) FTIR spectra of  $\text{cis-Pt}(^{13}\text{CO})_2\text{Cl}_2$  (red) and  $\text{cis-Pt}(\text{CO})_2\text{Cl}_2$  (black) obtained in toluene solution.

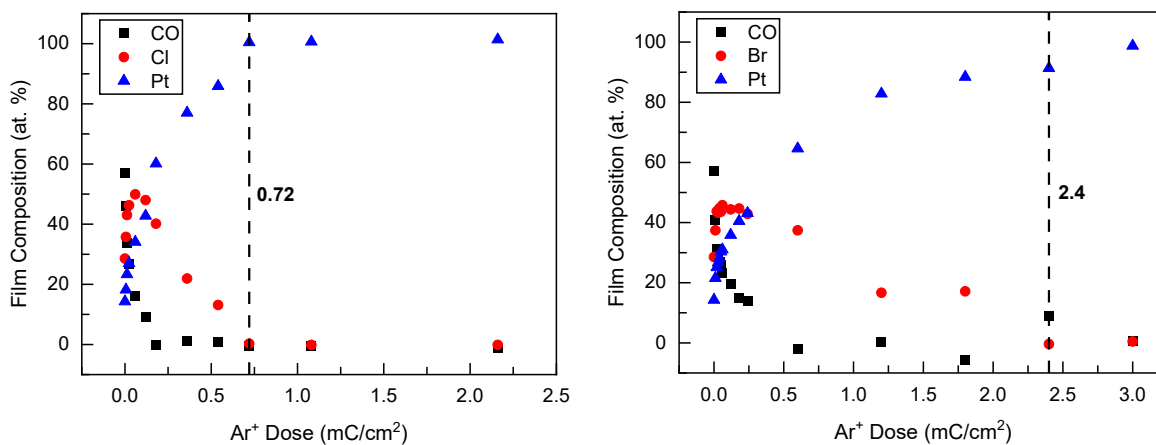

**Figure S2:** Film composition as a function of  $\text{Ar}^+$  ion exposure to  $\text{Pt}(\text{CO})_2\text{Cl}_2$  (left) and  $\text{Pt}(\text{CO})_2\text{Br}_2$  (right) as determined by XPS. The dotted line represents the minimum dose required to achieve a pure Pt film.

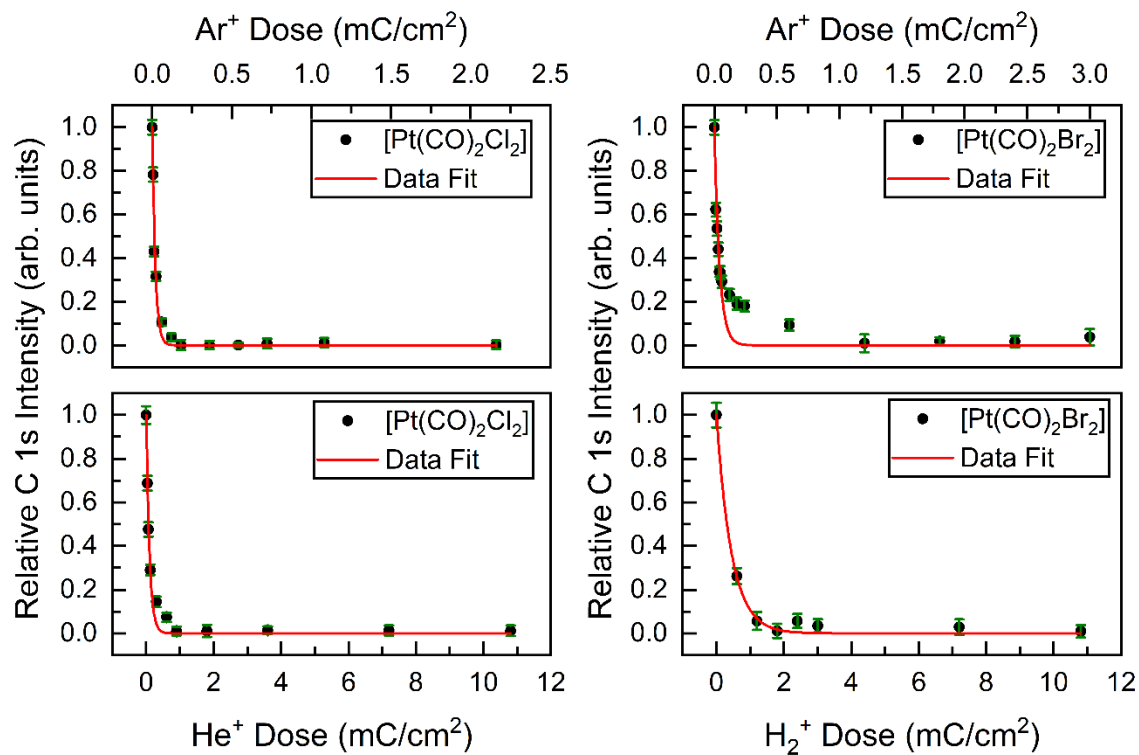

**Figure S3:** Change in carbon XPS intensity as a function of ion dose for each ion/precursor pair. The red line corresponds to a fit to a first-order kinetic decay profile.

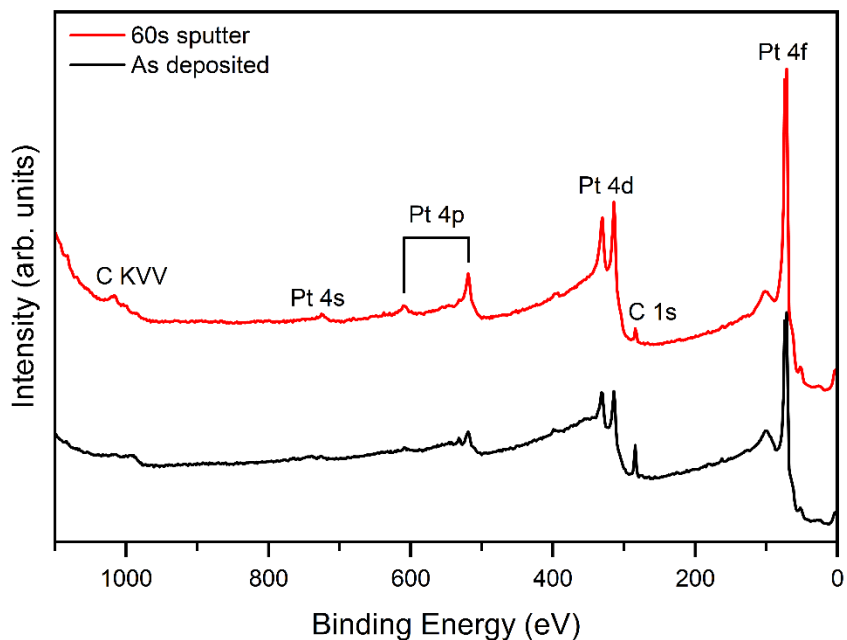

**Figure S4:** XPS survey spectra of a steady-state Pt(CO)<sub>2</sub>Cl<sub>2</sub> deposit before (black) and after (red) a 60 s 1 kV Ar<sup>+</sup> sputter to remove adventitious carbon.

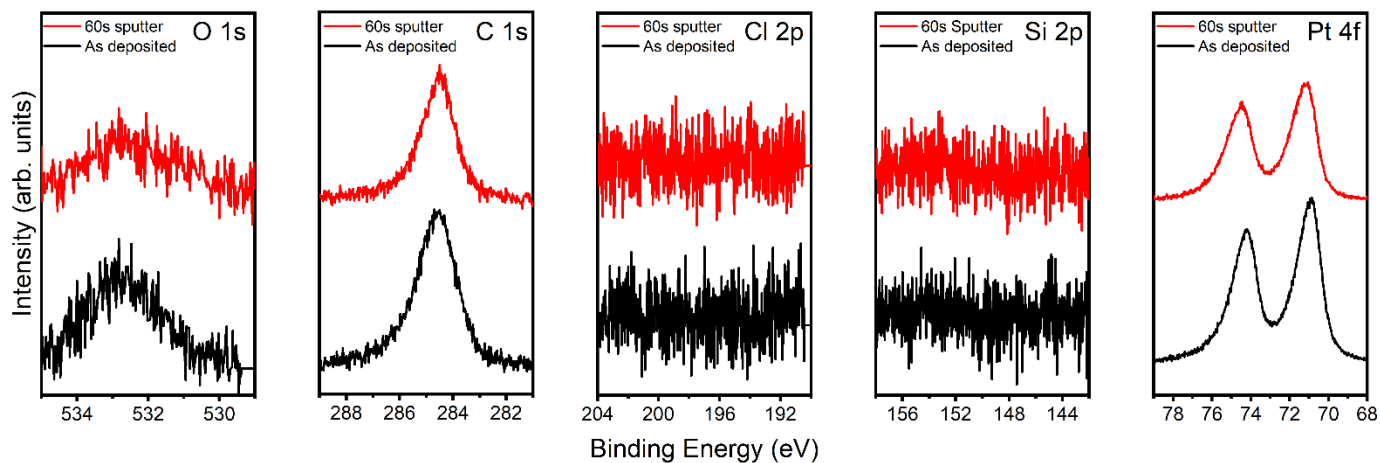

**Figure S5:** XPS spectra of the O (1s), C (1s), Cl (2p), Si (2p), and Pt (4f) regions of a steady-state  $\text{Pt}(\text{CO})_2\text{Cl}_2$  deposit before (black) and after (red) a 60 s 1 keV  $\text{Ar}^+$  sputter to remove adventitious carbon.
